# Supplementary material
Source: publisher figshare collection journal article supplement (https://tandf.figshare.com/ndownloader/files/20987577)
Supplement: Supplementary file 1 [file 20987577]

# Supplementary information

**Improved mesomorphic behavior and large birefringence of fluorinated liquid crystals containing ethynyl and 1-methyl-*1H*-benzimidazole moieties**

Shenghua Du1, Mengting Zhang1, Pei Chen*1, Jiazhen Dang1, Aiai Gao2, Weisong Du2, Xinbing Chen*1, Zhongwei An1,2

*1 Key Laboratory of Applied Surface and Colloid Chemistry (MOE); Shaanxi Key Laboratory for Advanced Energy Devices; Shaanxi Engineering Laboratory for Advanced Energy Technology, School of Materials Science and Engineering, Shaanxi Normal University, Xi'an 710119, PR China*

*2* *Xi'an Modern Chemistry Research Institute, Xi'an 710065, PR China*

***Spectroscopic data for compounds 2-[3-fluoro-4-[[-(pentyloxy)phenyl]ethynyl]phenyl]-1H- benzoimidazolen derivatives (nPEF(3)Px)***

**5****PEF(3)PH**: White crystal, yield 30% and m.p. 229.57 °C. 1H-NMR (400 MHz, DMSO-*d6*, TMS) δ (ppm) 13.04 (s, 1H), 8.04-8.00 (m, 2H), 7.75-7.71 (dd, *J* = 8.5 Hz, *J* = 7.6 Hz, 1H), 7.67-7.65 (d, *J* = 7.5 Hz, 1H), 7.53-7.51 (d, *J* = 8.3 Hz, 1H), 7.49-7.46 (d, *J* = 8.1 Hz, 2H), 7.24-7.17 (m, 2H), 6.96-6.94 (d, *J* = 8.5 Hz, 2H), 3.97-3.94 (t, *J* = 7.2 Hz, 2H), 1.71-1.63 (m, 2H), 1.38-1.25 (m, 4H), 0.87-0.83 (t, *J* = 7.4 Hz, 3H). IR (KBr, pellet, cm-1): 3260, 3059, 2943, 2864, 2200, 1601, 1504, 1427, 1238, 1120, 1012, 960, 821, 729, 590, 528. MALDI-TOF-MS m/z (rel. int.): Calc. 398.47, Found: 399.27 [M + H]+.

**6PEF(3)PH**: White crystal, yield 25% and m.p. 209.17 °C. 1H-NMR (400 MHz, DMSO-*d6*, TMS) δ (ppm) 13.03 (s, 1H), 8.06-8.01 (m, 2H), 7.76-7.71 (dd, *J* = 8.2 Hz, *J* = 5.8 Hz, 1H), 7.67-7.65 (d, *J* = 7.4 Hz, 1H), 7.53-7.51 (d, *J* = 8.7 Hz, 1H), 7.49-7.46 (d, *J* = 8.1 Hz, 2H), 7.26-7.16 (m, 2H), 6.97-6.96 (d, *J* = 8.2Hz, 2H), 3.98-3.96 (t, *J* = 7.0 Hz, 2H), 1.72-1.64 (m, 2H), 1.40-1.22 (m, 6H), 0.86-0.82 (t, *J* = 7.0 Hz, 3H). IR (KBr, pellet, cm-1): 3421, 3070, 2949, 2860, 2206, 1599, 1508, 1438, 1244, 1117, 1020, 889, 831, 738, 611, 532. MALDI-TOF-MS m/z (rel. int.): Calc. 412.50, Found: 413.44 [M + H]+.

**7PEF(3)PH**: White crystal, yield 21% and m.p. 212.97 °C. 1H-NMR (400 MHz, DMSO-*d6*, TMS) δ (ppm) 13.03 (s, 1H), 8.04-8.00 (m, 2H), 7.76-7.72 (dd, *J* = 8.5 Hz, *J* = 6.7 Hz, 1H), 7.67-7.65 (d, *J* = 7.6 Hz, 1H), 7.53-7.51 (d, *J* = 8.9 Hz, 1H), 7.48-7.46 (d, *J* = 7.5 Hz, 2H), 7.22-7.19 (m, 2H), 6.96-6.94 (d, *J* = 9.2 Hz, 2H), 3.96-3.92 (t, *J* = 7.6 Hz, 2H), 1.70-1.65 (m, 2H), 1.38-1.19 (m, 8H), 0.85-0.80 (t, *J* = 7.1 Hz, 3H). IR (KBr, pellet, cm-1): 3253, 3063, 2922, 2856, 2210, 1599, 1508, 1440, 1240, 1117, 1022, 902, 831, 736, 609, 532. MALDI-TOF-MS m/z (rel. int.): Calc. 426.53, Found: 427.50 [M + H]+.

**8PEF(3)PH**: White crystal, yield 25% and m.p. 200.76 °C. 1H-NMR (400 MHz, DMSO-*d6*, TMS) δ (ppm) 13.03 (s, 1H), 8.04-8.00 (m, 2H), 7.76-7.72 (dd, *J* = 8.2 Hz, *J* = 7.0 Hz, 1H), 7.67-7.65 (d, *J* = 7.5 Hz, 1H), 7.53-7.51 (d, *J* = 8.3 Hz, 1H), 7.49-7.47 (d, *J* = 8.8 Hz, 2H), 7.25-7.17 (m, 2H), 6.97-6.94 (d, *J* = 9.0 Hz, 2H), 3.98-3.95 (t, *J* = 6.7 Hz, 2H), 1.70-1.65 (m, 2H), 1.39-1.20 (m, 10H), 0.85-0.79 (t, *J* = 6.7 Hz, 3H). IR (KBr, pellet, cm-1): 3437, 3072, 2918, 2850, 2208, 1603, 1510, 1437, 1245, 1163, 1018, 889, 825, 738, 609, 530. MALDI-TOF-MS m/z (rel. int.): Calc. 440.55, Found: 441.44 [M + H]+.

**9PEF(3)PH**: White crystal, yield 22% and m.p. 186.53 °C. 1H-NMR (400 MHz, DMSO-*d6*, TMS) δ (ppm) 13.05 (s, 1H), 8.04-8.01 (m, 2H), 7.74-7.71 (dd, *J* = 8.8 Hz, *J* = 7.7 Hz, 1H), 7.67-7.65 (d, *J* = 7.9 Hz, 1H), 7.53-7.51 (d, *J* = 7.9 Hz, 1H), 7.49-7.46 (d, *J* = 8.8 Hz, 2H), 7.21-7.20 (m, 2H), 6.97-6.94 (d, *J* = 8.4 Hz, 2H), 3.97-3.94 (t, *J* = 7.1 Hz, 2H), 1.70-1.63 (m, 2H), 1.39-1.20 (m, 12H), 0.83-0.79 (t, *J* = 6.6 Hz, 3H). IR (KBr, pellet, cm-1): 3431, 3071, 2937, 2851, 2208, 1603, 1513, 1450, 1251, 1174, 1016, 900, 829, 746, 621, 532. MALDI-TOF-MS m/z (rel. int.): Calc. 454.58, Found: 455.51 [M + H]+.

**10PEF(3)PH**: White crystal, yield 24% and m.p. 189.23 °C. 1H-NMR (400 MHz, DMSO-*d6*, TMS) δ (ppm) 13.05 (s, 1H), 8.04-8.00 (m, 2H), 7.76-7.71 (dd, *J* = 9.1 Hz, *J* = 7.2 Hz, 1H), 7.67-7.65 (d, *J* = 7.9 Hz, 1H), 7.53-7.51 (d, *J* = 8.6 Hz, 1H), 7.49-7.47 (d, *J* = 8.7 Hz, 2H), 7.21-7.19 (m, 2H), 6.97-6.94 (d, *J* = 9.0 Hz, 2H), 3.97-3.95 (t, *J* = 6.7 Hz, 2H), 1.70-1.62 (m, 2H), 1.38-1.17 (m, 14H), 0.85-0.79 (t, *J* = 7.2 Hz, 3H). IR (KBr, pellet, cm-1): 3431, 3069, 2920, 2850, 2208, 1601, 1510, 1441, 1246, 1163, 1016, 891, 825, 742, 609, 532. MALDI-TOF-MS m/z (rel. int.): Calc. 468.60, Found: 469.52 [M + H]+.

**11PEF(3)PH**: White crystal, yield 23% and m.p. 200.40 °C. 1H-NMR (400 MHz, DMSO-*d6*, TMS) δ (ppm) 13.03 (s, 1H), 8.04-8.00 (m, 2H), 7.76-7.72 (dd, *J* = 9.0 Hz, *J* = 8.0 Hz, 1H), 7.67-7.65 (d, *J* = 6.8 Hz, 1H), 7.53-7.51 (d, *J* = 8.6 Hz, 1H), 7.49-7.476 (d,*J*= 8.2 Hz, 2H), 7.22-7.19 (m, 2H), 6.97-6.95 (d, *J* = 8.6 Hz, 2H), 3.99-3.95 (t, *J* = 7.8 Hz, 2H), 1.70-1.63 (m, 2H), 1.40-1.20 (m, 16H), 0.84-0.80 (t, *J* = 7.8 Hz, 3H). IR (KBr, pellet, cm-1): 3415, 3074, 2924, 2851, 2210, 1603, 1514, 1452, 1250, 1175, 1022, 899, 829, 746, 621, 532. MALDI-TOF-MS m/z (rel. int.): Calc. 482.63, Found: 483.47 [M + H]+.

**5****PEF(3)PM**: Yellow crystal, yield 29% and m.p. 217.56 °C. 1H-NMR (400 MHz, DMSO-*d6*, TMS) δ (ppm) 13.04 (s, 1H), 8.01-7.97 (m, 2H), 7.74-7.69 (dd, *J* = 8.0 Hz, *J* = 7.3 Hz, 1H), 7.48-7.46 (m, 3H), 7.40 (s, 1H), 7.04-7.01 (d, *J* = 8.1 Hz, 1H), 6.96-6.94 (d, *J* = 8.9 Hz, 2H), 3.98-3.94 (t, *J* = 7.8 Hz, 2H), 2.58 (s, 3H), 1.71-1.64 (m, 2H), 1.38-1.25 (m, 4H), 0.88-0.85 (t, *J* = 7.8 Hz, 3H). IR (KBr, pellet, cm-1): 3431, 3051, 2916, 2854, 2204, 1599, 1510, 1452, 1244, 1167, 1006, 881, 825, 717, 594, 532. MALDI-TOF-MS m/z (rel. int.): Calc. 412.50, Found: 413.51 [M + H]+.

**6PEF(3)PM**: Yellow crystal, yield 27% and m.p. 186.53 °C. 1H-NMR (400 MHz, DMSO-*d6*, TMS) δ (ppm) 12.97 (s, 1H), 7.99-7.96 (m, 2H), 7.72-7.68 (dd, *J* = 8.4 Hz, *J* = 7.3 Hz, 1H), 7.62-7.44 (m, 3H), 7.30 (s, 1H), 7.02-7.0 (d, *J* = 8.6 Hz, 1H), 6.95-6.93 (d, *J* = 9.5 Hz, 2H), 3.96-3.92 (t, *J* = 7.2 Hz, 2H), 2.46 (s, 3H), 1.68-1.62 (m, 2H), 1.38-1.21 (m, 6H), 0.83-0.80 (t, *J* = 9.1 Hz, 3H). IR (KBr, pellet, cm-1): 3433, 3061, 2926, 2858, 2210, 1599, 1508, 1445, 1242, 1165, 1022, 891, 825, 717, 596, 532. MALDI-TOF-MS m/z (rel. int.): Calc. 426.53, Found: 427.50 [M + H]+.

**7PEF(3)PM**: Yellow crystal, yield 23% and m.p. 177.90 °C. 1H-NMR (400 MHz, DMSO-*d6*, TMS) δ (ppm) 13.04 (s, 1H), 8.01-7.97 (m, 2H), 7.73-7.69 (dd, *J*= 8.4 Hz, *J* = 7.2 Hz, 1H), 7.48-7.46 (m, 3H), 7.36 (s, 1H), 7.04-7.01 (d, *J* = 8.2 Hz, 1H), 6.97-6.94 (d, *J* = 8.4 Hz, 2H), 3.97-3.94 (t, *J* = 8.5 Hz, 2H), 2.47 (s, 3H), 1.691-1.64 (m, 2H), 1.36-1.23 (m, 8H), 0.84-0.81 (t, *J* = 8.5 Hz, 3H). IR (KBr, pellet, cm-1): 3431, 3084, 2928, 2858, 2208, 1601, 1510, 1446, 1238, 1174, 1018, 885, 829, 738, 603, 532. MALDI-TOF-MS m/z (rel. int.): Calc. 440.55, Found: 441.53 [M + H]+.

**8PEF(3)PM**: Yellow crystal, yield 23% and m.p. 160.62 °C. 1H-NMR (400 MHz, DMSO-*d6*, TMS) δ (ppm) 13.04 (s, 1H), 8.01-7.97 (m, 2H), 7.74-7.69 (dd, *J* = 8.0 Hz, *J* = 7.3 Hz, 1H), 7.48-7.46 (m, 3H), 7.30 (s, 1H), 7.01-7.00 (d, *J* = 8.0 Hz, 1H), 6.97-6.96 (d, *J* = 7.6 Hz, 2H), 3.97-3.94 (t, *J* = 7.4 Hz, 2H), 2.46 (s, 3H), 1.71-1.64 (m, 2H), 1.37-1.20 (m, 10H), 0.85-0.79 (t, *J* = 7.5 Hz, 3H). IR (KBr, pellet, cm-1): 3421, 3081, 2924, 2856, 2210, 1601, 1508, 1447, 1244, 1164, 1018, 896, 827, 717, 594, 530. MALDI-TOF-MS m/z (rel. int.): Calc. 454.58, Found: 455.31[M + H]+.

**9PEF(3)PM**: Yellow crystal, yield 22% and m.p. 176.98 °C. 1H-NMR (400 MHz, DMSO-*d6*, TMS) δ (ppm) 12.91 (s, 1H), 8.01-7.97 (m, 2H), 7.75-7.69 (dd, *J* = 7.7 Hz, *J* = 6.7 Hz, 1H), 7.55-7.44 (m, 3H), 7.30 (s, 1H), 7.04-7.00 (d, *J* = 8.0 Hz, 1H), 6.96-6.94 (d, *J* = 8.6 Hz, 2H), 3.96-3.93 (t, *J* = 7.6 Hz, 2H), 2.46 (s, 3H), 1.69-1.62 (m, 2H), 1.37-1.19 (m, 12H), 0.82-0.79 (t, *J* = 7.7 Hz, 3H). IR (KBr, pellet, cm-1): 3435, 3071, 2924, 2853, 2208, 1603, 1514, 1447, 1249, 1175, 1014, 879, 825, 729, 600, 534. MALDI-TOF-MS m/z (rel. int.): Calc. 468.60, Found: 469.48 [M + H]+.

**10PEF(3)PM**: Yellow crystal, yield 24% and m.p. 169.28 °C. 1H-NMR (400 MHz, DMSO-*d6*, TMS) δ (ppm) 12.94 (s, 1H), 8.03-7.98 (m, 2H), 7.75-7.69 (dd, *J* = 8.0 Hz, *J* = 7.2Hz, 1H), 7.49-7.46 (m, 3H), 7.28 (s, 1H), 7.05-7.01 (d, *J* = 8.7 Hz, 1H), 6.96-6.93 (d, *J* = 9.4 Hz, 2H), 3.97-3.93 (t, *J* = 8.2 Hz, 2H), 2.47 (s, 3H), 1.70-1.65 (m, 2H), 1.37-1.20 (m, 14H), 0.83-0.79 (t, *J* = 7.3 Hz, 3H). IR (KBr, pellet, cm-1): 3429, 3041, 2924, 2853, 2208, 1603, 1514, 1447, 1250, 1175, 1014, 877, 835, 729, 600, 534. MALDI-TOF-MS m/z (rel. int.): Calc. 482.63, Found: 483.56 [M + H]+.

**11PEF(3)PM**: Yellow crystal, yield 23% and m.p. 167.10 °C. 1H-NMR (400 MHz, DMSO-*d6*, TMS) δ (ppm) 13.04 (s, 1H), 8.01-7.97 (m, 2H), 7.75-7.69 (dd, *J* = 7.6 Hz, *J* = 6.8 Hz, 1H), 7.55-7.44 (m, 3H), 7.30 (s, 1H), 7.04-7.01 (d, *J* = 8.5 Hz, 1H), 6.96-6.94 (d, *J* = 8.8 Hz, 2H), 3.97-3.93 (t, *J* = 7.2 Hz, 2H), 2.45(s, 3H), 1.71-1.65(m, 2H), 1.36-1.11 (m, 16H), 0.88-0.85 (t, *J* = 7.8 Hz, 3H). IR (KBr, pellet, cm-1): 3417, 3072, 2922, 2854, 2210, 1601, 1512, 1462, 1251, 1167, 1018, 887, 831, 721, 600, 536. MALDI-TOF-MS m/z (rel. int.): Calc. 496.66, Found: 497.60 [M + H]+.

**5PEF(3)PN**: Brown crystal, yield 29% and m.p. 240.24 °C. 1H-NMR (400 MHz, DMSO-*d6*, TMS) δ (ppm) 13.64 (s, 1H), 8.49 (s, 1H), 8.11-8.08 (d, *J* = 7.7 Hz, 1H), 8.02-7.99 (m, 2H), 7.76-7.71 (dd, *J* = 9.0 Hz, *J* = 7.7 Hz, 1H), 7.69-7.66 (d, *J* = 8.1 Hz, 1H), 7.46-7.44 (d, *J* = 7.7 Hz, 2H), 6.96-6.92 (d, *J* = 9.0 Hz, 2H), 3.96-3.94 (t, *J* = 8.2 Hz, 2H), 1.70-1.65 (m, 2H), 1.38-1.25 (m, 4H), 0.88-0.85 (t, *J* = 8.2 Hz, 3H). IR (KBr, pellet, cm-1): 3333, 3076, 2928, 2858, 2210, 1601, 1510, 1446, 1238, 1174, 1018, 883, 829, 738, 602, 532. MALDI-TOF-MS m/z (rel. int.): Calc. 443.47, Found: 444.26 [M + H]+.

**6PEF(3)PN**: Brown crystal, yield 27% and m.p. 246.20 °C. 1H-NMR (400 MHz, DMSO-*d6*, TMS) δ (ppm) 13.69 (s, 1H), 8.52 (s, 1H), 8.14-8.10 (d, *J* = 7.9 Hz, 1H), 8.06-8.02 (m, 2H), 7.78-7.75 (dd, *J* = 8.8 Hz, *J* = 7.4 Hz, 1H), 7.72-7.70 (d, *J* = 8.0 Hz, 1H), 7.48-7.46 (d, *J* = 7.4 Hz, 2H), 6.96-6.94 (d, *J* = 9.0 Hz, 2H), 3.98-3.94 (t, *J* = 8.2 Hz, 2H), 1.70-1.64 (m, 2H), 1.40-1.18 (m, 6H), 0.86-0.82 (t, *J* = 8.5 Hz, 3H). IR (KBr, pellet, cm-1): 3332, 3076, 2928, 2858, 2210, 1601, 1510, 1447, 1238, 1175, 1018, 883, 830, 739, 602, 530. MALDI-TOF-MS m/z (rel. int.): Calc. 457.50, Found: 458.46 [M + H]+.

**7PEF(3)PN**: Brown crystal, yield 24% and m.p. 233.69 °C. 1H-NMR (400 MHz, DMSO-*d6*, TMS) δ (ppm) 13.69 (s, 1H), 8.59 (s, 1H), 8.10-8.07 (d, *J* = 8.0 Hz, 1H), 8.06-8.02 (m, 2H), 7.76-7.74 (dd, *J* = 9.3 Hz, *J* = 7.6 Hz, 1H), 7.69-7.68 (d, *J* = 7.1 Hz, 1H), 7.47-7.44 (d, *J* = 7.4 Hz, 2H), 6.96-6.92 (d, *J* = 9.0 Hz, 2H), 3.96-3.94 (t, *J* = 8.7 Hz, 2H), 1.70-1.62 (m, 2H), 1.39-1.22 (m, 8H) 0.84-0.80 (t, *J* = 8.7 Hz, 3H). IR (KBr, pellet, cm-1): 3298, 3071, 2926, 2858, 2206, 1599, 1506, 1439, 1244, 1062, 1020, 883, 822, 731, 636, 527. MALDI-TOF-MS m/z (rel. int.): Calc. 471.52, Found: 472.46 [M + H]+.

**8PEF(3)PN**: Brown crystal, yield 24% and m.p. 227.34 °C. 1H-NMR (400 MHz, DMSO-*d6*, TMS) δ (ppm) 13.67 (s, 1H), 8.50 (s, 1H), 8.12-8.07 (d, *J* = 7.8 Hz, 1H), 8.01-7.99 (m, 2H), 7.74-7.71 (dd, *J* =8.2 Hz, *J* = 7.9 Hz, 1H), 7.69-7.67 (d, *J* = 7.01 Hz, 1H), 7.46-7.44 (d, *J* = 7.7 Hz, 2H), 6.96-6.92 (d, *J* = 9.0 Hz, 2H), 3.96-3.90 (t, *J* = 8.9 Hz, 2H), 1.69-1.60 (m, 2H), 1.29-1.19 (m, 10H), 0.82-0.79 (t, *J* = 8.9 Hz, 3H). IR (KBr, pellet, cm-1): 3302, 3078, 2922, 2854, 2206, 1599, 1506, 1443, 1244, 1163, 1018, 885, 822, 733, 615, 525. MALDI-TOF-MS m/z (rel. int.): Calc. 485.55, Found: 486.55 [M + H]+.

**9PEF(3)PN**: Brown crystal, yield 22% and m.p. 229.85 °C. 1H-NMR (400 MHz, DMSO-*d6*, TMS) δ (ppm) 13.66 (s, 1H), 8.37 (s, 1H), 8.06-8.02 (d, *J* = 6.7 Hz, 1H), 7.97-7.94 (m, 2H), 7.69-7.64 (dd, *J* = 8.8 Hz, *J* = 6.7 Hz, 1H), 7.65-7.63 (d, *J* = 8.1 Hz, 1H), 7.42-7.39 (d, *J* =8.3 Hz, 2H), 6.89-6.87 (d, *J* = 8.1 Hz, 2H), 3.90-3.86 (t, *J* = 8.8 Hz, 2H), 1.66-1.58 (m, 2H), 1.36-1.10 (m, 12H), 0.81-0.76 (t, *J* = 8.8 Hz, 3H). IR (KBr, pellet, cm-1): 3402, 3072, 2920, 2851, 2210, 1601, 1510, 1447, 1248, 1172, 1030, 882, 827, 739, 602, 534. MALDI-TOF-MS m/z (rel. int.): Calc. 499.58, Found: 500.60 [M + H]+.

**10PEF(3)PN**: Brown crystal, yield 24% and m.p. 225.16 °C. 1H-NMR (400 MHz, DMSO-*d6*, TMS) δ (ppm) 13.65 (s, 1H), 8.51 (s, 1H), 8.11-8.09 (d, *J* = 7.7 Hz, 1H), 8.05-8.02 (m, 2H), 7.77-7.73 (dd, *J* = 9.1 Hz, *J* = 7.8Hz, 1H), 7.69-7.68 (d, *J* = 6.2 Hz, 1H), 7.48-7.45 (d, *J* = 7.8 Hz, 2H), 6.95-6.93 (d, *J* = 9.1 Hz, 2H), 3.96-3.93 (t, *J* = 7.7 Hz, 2H), 1.69-1.62 (m, 2H), 1.38-1.20 (m, 14H), 0.83-0.79 (t, *J* = 9.0 Hz, 3H). IR (KBr, pellet, cm-1): 3292, 3079, 2928, 2854, 2209, 1599, 1506, 1441, 1246, 1165, 1022, 883, 820, 729, 636, 527. MALDI-TOF-MS m/z (rel. int.): Calc. 513.60, Found: 514.32 [M + H]+.

**11PEF(3)PN**: Brown crystal, yield 20% and m.p. 196.91 °C. 1H-NMR (400 MHz, DMSO-*d6*, TMS) δ (ppm) 13.64 (s, 1H), 8.60 (s, 1H), 8.13-8.10 (d, *J* = 8.0 Hz, 1H), 8.08-8.05 (m, 2H), 7.71-7.77 (dd, *J* = 8.3 Hz, *J* = 7.8 Hz, 1H), 7.76-7.74 (d, *J* = 8.9 Hz, 1H), 7.50-7.48 (d, *J* = 8.9 Hz, 2H), 6.98-6.95 (d, *J* = 8.9 Hz, 2H), 3.99-3.95 (t, *J* = 8.2 Hz, 2H), 1.71-1.65 (m, 2H), 1.37-1.21 (m, 16H), 0.83-0.79 (t, *J* = 8.2 Hz, 3H). IR (KBr, pellet, cm-1): 3473, 3037, 2922, 2851, 2206, 1603, 1512, 1446, 1250, 1171, 1024, 885, 827, 735, 608, 532. MALDI-TOF-MS m/z (rel. int.): Calc. 527.63, Found: 528.46 [M + H]+.

***Spectroscopic data for compounds 2-[4-[2-[4-(alkoxy)phenyl]ethynyl]-3-fluorophenyl] -1-methyl-1H-benzimidazole derivatives (nPEF(3)PMx)***

**5PEF(3)PMH**: White crystal, yield 50% and m.p. 116.41 °C. 1H-NMR (400 MHz, CDCl3, TMS) δ (ppm) 7.83-7.81 (d, *J* = 7.8 Hz, 1H), 7.66-7.62 (dd, *J* = 7.5 Hz, *J* = 7.3 Hz, 1H), 7.56-7.54 (m, 2H), 7.51-7.49 (d, *J* = 8.6 Hz, 2H), 7.41-7.30 (m, 3H), 6.89-6.87 (d, *J* = 8.6 Hz, 2H), 3.99-3.95 (t, *J* = 6.2 Hz, 2H), 3.90 (s, 3H), 1.83-1.76 (m, 2H), 1.48-1.34 (m, 4H), 0.93-0.91 (t, *J* = 6.1Hz, 3H). IR (KBr, pellet, cm-1): 3062, 2950, 2862, 2206, 1600, 1510, 1442, 1286, 1245, 1165, 1012, 833, 738, 613, 532. MALDI-TOF-MS m/z (rel. int.): Calc. 412.50, Found: 413.57 [M + H]+. EA: Calc. for C27H25FN2O: C: 78.62%, H: 6.11%, N:6.79%; Found: C: 78.43%, H: 5.94%, N: 6.69%.

**6PEF(3)PMH**: White crystal, yield 43% and m.p. 106.88 °C. 1H-NMR (400 MHz, CDCl3, TMS) δ (ppm) 7.83-7.81 (d, *J* = 8.0 Hz, 1H), 7.66-7.62 (dd, *J* = 8.6 Hz, *J* = 6.1 Hz, 1H), 7.57-7.55 (m, 2H), 7.51-7.49 (d, *J* = 8.6 Hz, 2H), 7.40-7.32 (m, 3H), 6.89-6.87 (d, *J* = 8.6 Hz, 2H), 3.99-3.95 (t, *J* = 8.6 Hz, 2H), 3.91 (s, 3H), 1.82-1.75 (m, 2H), 1.48-1.33 (m, 6H), 0.92-0.88 (t, *J* = 7.6 Hz, 3H). IR (KBr, pellet, cm-1): 3062, 2943, 2858, 2208, 1599, 1505, 1469, 1288, 1244, 1164, 1020, 835, 744, 607, 530. MALDI-TOF-MS m/z (rel. int.): Calc. 426.53, Found: 427.30 [M + H]+. EA: Calc. for C28H27FN2O: C: 78.85%, H: 6.38%, N: 6.57%; Found: C: 78.84%, H: 6.31%, N: 6.42%.

**7PEF(3)PMH**: White crystal, yield 45% and m.p. 99.73 °C. 1H-NMR (400 MHz, CDCl3, TMS) δ (ppm) 7.81-7.79 (d, *J* = 8.1 Hz, 1H), 7.64-7.60 (dd, *J* = 7.1 Hz, *J* = 6.7 Hz, 1H), 7.56-7.53 (m, 2H), 7.50-7.48 (d, *J* = 7.9 Hz, 2H), 7.39-7.33 (m, 3H), 6.87-6.85 (d, *J* = 7.7 Hz, 2H), 3.97-3.95 (t, *J* = 6.7 Hz, 2H), 3.90 (s, 3H), 1.81-1.74 (m, 2H), 1.46-1.30 (m, 8H), 0.90-0.87 (t, *J* = 6.1Hz, 3H). IR (KBr, pellet, cm-1): 3044, 2925, 2858, 2210, 1598, 1510, 1469, 1286, 1146, 1163, 1018, 835, 738, 642, 528. MALDI-TOF-MS m/z (rel. int.): Calc. 440.55, Found: 441.41 [M + H]+. EA: Calc. for C29H29FN2O: C: 79.06%, H: 6.63%, N: 6.36%; Found: C: 78.62%, H: 6.43%, N: 6.20%.

**8PEF(3)PMH**: White crystal, yield 41% and m.p. 100.33 °C. 1H-NMR (400 MHz, CDCl3, TMS) δ (ppm) 7.83-7.81 (d, *J* = 7.8 Hz, 1H), 7.66-7.62 (dd, *J* = 7.0 Hz, *J* = 6.2 Hz, 1H), 7.57-7.55 (m, 2H), 7.51-7.49 (d, *J* = 8.1 Hz, 2H), 7.42-7.30 (m, 3H), 6.89-6.87 (d, *J* = 7.5 Hz, 2H), 3.99-3.95 (t, *J* = 6.1 Hz, 2H), 3.91 (s, 3H), 1.82-1.75 (m, 2H), 1.44-1.30 (m, 10H), 0.89-0.86 (t, *J* = 7.5 Hz, 3H). IR (KBr, pellet, cm-1): 3045, 2921, 2856, 2014, 1600, 1504, 1469, 1288, 1170, 1112, 1018, 837, 740, 588, 534. MALDI-TOF-MS m/z (rel. int.): Calc. 454.58, Found: 455.47 [M + H]+. EA: Calc. for C30H31FN2O: C: 79.26%, H: 6.87%, N: 6.16%; Found: C: 79.20%, H: 6.85%, N: 6.01%.

**9PEF(3)PMH**: White crystal, yield 43% and m.p. 99.94 °C. 1H-NMR (400 MHz, CDCl3, TMS) δ (ppm) 7.83-7.81 (d, *J* = 8.2 Hz, 1H), 7.65-7.63 (dd, *J* = 7.6 Hz, *J* = 8..6 Hz, 1H), 7.56-7.54 (m, 2H), 7.51-7.49 (d, *J* = 8.6 Hz, 2H), 7.41-7.30 (m, 3H), 6.88-6.86 (d, *J* = 8.6 Hz, 2H), 3.98-3.95 (t, *J* = 6.7 Hz, 2H), 3.89 (s, 3H), 1.81-1.75 (m, 2H), 1.48-1.27 (m, 12H), 0.90-0.86 (t, *J* = 7.3 Hz, 3H). IR (KBr, pellet, cm-1): 3047, 2921, 2852, 2014, 1602, 1508, 1473, 1286, 1174, 1116, 1012, 833, 742, 642, 536. MALDI-TOF-MS m/z (rel. int.): Calc. 468.60, Found: 469.50 [M + H]+. EA: Calc. for C31H33FN2O: C: 79.46%, H: 7.10%, N:5.98%; Found: C: 79.10%, H: 7.04%, N: 5.73%.

**10PEF(3)PMH**: White crystal, yield 44% and m.p. 83.78 °C. 1H-NMR (400 MHz, CDCl3, TMS) δ (ppm) 7.83-7.81 (d, *J* = 7.7 Hz, 1H), 7.66-7.62 (dd, *J* = 7.4 Hz, *J* = 6.4 Hz, 1H), 7.57-7.55 (m, 2H), 7.52-7.50 (d, *J* = 8.4 Hz, 2H), 7.41-7.34 (m, 3H), 6.89-6.87 (d, *J* = 8.0 Hz, 2H), 3.99-3.96 (t, *J* = 6.4 Hz, 2H), 3.91 (s, 3H), 1.82-1.76 (m, 2H), 1.46-1.27 (m, 14H), 0.90-0.87 (t, *J* = 7.6 Hz, 3H). IR (KBr, pellet, cm-1): 3051, 2921, 2854, 2014, 1600, 1512, 1463, 1288, 1166, 1110, 1014, 833, 738, 632, 536. MALDI-TOF-MS m/z (rel. int.): Calc. 482.63, Found: 483.34 [M + H]+. EA: Calc. for C32H35FN2O: C: 79.63%, H: 7.31%, N: 5.80%; Found: C: 80.58%, H: 7.35%, N: 5.84%.

**11PEF(3)PMH**: White crystal, yield 53% and m.p. 100.75 °C. 1H-NMR (400 MHz, CDCl3, TMS) δ (ppm) 7.83-7.79 (d, *J* = 7.4 Hz, 1H), 7.66-7.62 (dd, *J* = 7.6 Hz, *J* = 8.2 Hz, 1H), 7.57-7.55 (m, 2H), 7.51-7.49 (d, *J* = 8.2 Hz, 2H), 7.42-7.30 (m, 3H), 6.89-6.87 (d, *J* = 8.8 Hz, 2H), 4.01-3.95 (t, *J* = 8.8 Hz, 2H), 3.90 (s, 3H), 1.82-1.75 (m, 2H), 1.45-1.26 (m, 16H), 0.89-0.85 (t, *J* = 7.2 Hz, 3H). IR (KBr, pellet, cm-1): 3047, 2922, 2854, 2218, 1603, 1510, 1469, 1288, 1167, 1111, 1015, 835, 736, 644, 530. MALDI-TOF-MS m/z (rel. int.): Calc. 496.66, Found: 497.49 [M + H]+. EA: Calc. for C33H37FN2O: C: 79.80%, H: 7.51%, N: 5.64%; Found: C: 81.50%, H: 7.44%, N: 5.40%.

**5PEF(3)PMM**: White crystal, yield 50% and m.p. 113.70 °C. 1H-NMR (400 MHz, CDCl3, TMS) δ (ppm) 7.62-7.60 (dd, *J* = 7.5 Hz, *J* = 7.3 Hz, 1H), 7.58 (s, 1H), 7.55-7.53 (m, 2H), 7.51-7.48 (d, *J* = 8.3 Hz, 2H), 7.18-7.13 (m, 2H), 6.88-6.86 (d, *J* = 8.7 Hz, 2H), 3.98-3.95 (t, *J* = 6.7 Hz, 2H), 3.86 (s, 3H), 2.52 (s, 3H), 1.83-1.76 (m, 2H), 1.47-1.35 (m, 4H), 0.94-0.92 (t, *J* = 6.1Hz, 3H). IR (KBr, pellet, cm-1): 3044, 2941, 2867, 2212, 1603, 1506, 1442, 1288, 1244, 1169, 1020, 833, 719, 596, 530. MALDI-TOF-MS m/z (rel. int.): Calc. 426.53, Found: 427.51 [M + H]+. EA: Calc. for C28H27FN2O: C: 78.85%, H: 6.38%, N: 6.57%; Found: C: 78.73%, H: 6.21%, N: 6.44%.

**6PEF(3)PMM**: Yellow crystal, yield 43% and m.p. 103.70 °C. 1H-NMR (400 MHz, CDCl3, TMS) δ (ppm) 7.64-7.61 (dd, *J* = 7.6 Hz, *J* = 8.6 Hz, 1H), 7.59 (s, 1H), 7.55-7.53 (m, 2H), 7.51-7.49 (d, *J* = 8.6 Hz, 2H), 7.18-7.13 (m, 2H), 6.88-6.87 (d, *J* = 8.7 Hz, 2H), 3.99-3.95 (t, *J* = 6.9 Hz, 2H), 3.86 (s, 3H), 2.52 (s, 3H), 1.82-1.75(m, 2H), 1.47-1.33 (m, 6H), 0.92-0.89 (t, *J* = 6.9 Hz, 3H). IR (KBr, pellet, cm-1): 3034, 2926, 2860, 2212, 1603, 1503, 1463, 1288, 1244, 1168, 1022, 831, 723, 628, 531. MALDI-TOF-MS m/z (rel. int.): Calc. 440.55, Found: 441.36 [M + H]+. EA: Calc. for C29H29FN2O: C: 79.06%, H: 6.63%, N: 6.36%; Found: C: 78.62%, H: 6.43%, N: 6.20%.

**7PEF(3)PMM**: Yellow crystal, yield 41% and m.p. 100.82 °C. 1H-NMR (400 MHz, CDCl3, TMS) δ (ppm) 7.62-7.59 (dd, *J* = 6.5 Hz, *J* = 6.9 Hz, 1H), 7.59 (s, 1H), 7.55-7.53 (m, 2H), 7.51-7.48 (d, *J* = 7.5 Hz, 2H), 7.18-7.13 (m, 2H), 6.88-6.86 (d, *J* = 8.0 Hz, 2H), 3.98-3.95 (t, *J* = 6.9 Hz, 2H), 3.86 (s, 3H), 2.53 (s, 3H), 1.82-1.75(m, 2H), 1.47-1.27 (m, 8H), 0.90-0.87 (t, *J* = 6.5 Hz, 3H). IR (KBr, pellet, cm-1): 3036, 2926, 2860, 2210, 1593, 1503, 1462, 1283, 1240, 1163, 1003, 833, 717, 594, 532. MALDI-TOF-MS m/z (rel. int.): Calc. 454.58, Found: 455.47 [M + H]+. EA: Calc. for C30H31FN2O: C: 79.26%, H: 6.87%, N: 6.16%; Found: C: 79.72%, H: 6.87%, N: 6.04%.

**8PEF(3)PMM**: Yellow crystal, yield 40% and m.p. 93.56 °C. 1H-NMR (400 MHz, CDCl3, TMS) δ (ppm) 7.62-7.59 (dd, *J* = 7.1 Hz, *J* = 6.4 Hz, 1H), 7.59 (s, 1H), 7.55-7.53 (m, 2H), 7.51-7.48 (d, *J* = 8.9 Hz, 2H), 7.18-7.13 (m, 2H), 6.88-6.86 (d, *J* = 8.9 Hz, 2H), 3.98-3.95 (t, *J* = 6.0 Hz, 2H), 3.86 (s, 3H), 2.52 (s, 3H), 1.82-1.75 (m, 2H), 1.43-1.27 (m, 10H), 0.94-0.92 (t, *J* = 6.3 Hz, 3H). IR (KBr, pellet, cm-1): 3055, 2926, 2860, 2212, 1598, 1510, 1465, 1290, 1245, 1174, 1018, 839, 738, 590, 534. MALDI-TOF-MS m/z (rel. int.): Calc. 468.60, Found: 469.30 [M + H]+. EA: Calc. for C31H33FN2O: C: 79.46%, H: 7.10%, N: 5.98%; Found: C: 78.64%, H: 7.13%, N: 5.68%.

**9PEF(3)PMM**: Yellow crystal, yield 43% and m.p. 89.62 °C. 1H-NMR (400 MHz, CDCl3, TMS) δ (ppm) 7.62-7.60 (dd, *J* = 6.5 Hz, *J* = 6.7 Hz, 1H), 7.59 (s, 1H), 7.55-7.53 (m, 2H), 7.51-7.498 (d, *J* = 8.4 Hz, 2H), 7.18-7.13 (m, 2H), 6.89-6.86 (d, *J* = 8.8 Hz, 2H), 3.98-3.95 (t, *J* = 7.2 Hz, 2H), 3.86 (s, 3H), 2.52 (s, 3H), 1.82-1.75 (m, 2H), 1.47-1.27 (m, 12H), 0.89-0.86 (t, *J* = 6.1Hz, 3H). IR (KBr, pellet, cm-1): 3026, 2921, 2854, 2212, 1603, 1506, 1469, 1282, 1245, 1167, 1014, 831, 727, 604, 534. MALDI-TOF-MS m/z (rel. int.): Calc. 482.63, Found: 483.55 [M + H]+. EA: Calc. for C32H35FN2O: C: 79.63%, H: 7.31%, N: 5.80%; Found: C: 80.84%, H: 7.56%, N: 5.86%.

**10PEF(3)PMM**: Yellow crystal, yield 46% and m.p. 91.21 °C. 1H-NMR (400 MHz, CDCl3, TMS) δ (ppm) 77.62-7.60 (dd, *J* = 7.5 Hz, *J* = 7.3 Hz, 1H), 7.59 (s, 1H), 7.55-7.53 (m, 2H), 7.51-7.48 (d, *J* = 8.3 Hz, 2H), 7.18-7.13 (m, 2H), 6.88-6.86 (d, *J* = 8.7 Hz, 2H), 3.97-3.94 (t, *J* = 6.9 Hz, 2H), 3.85 (s, 3H), 2.50 (s, 3H), 1.80-1.74 (m, 2H), 1.48-1.31 (m, 14H), 0.94-0.92 (t, *J* = 6.9 Hz, 3H). IR (KBr, pellet, cm-1): 3030, 2922, 2856, 2214, 1601, 1506, 1466, 1284, 1248, 1170, 1018, 835, 721, 594, 532. MALDI-TOF-MS m/z (rel. int.): Calc. 496.66, Found: 497.31 [M + H]+. EA: Calc. for C33H37FN2O: C: 79.80%, H: 7.51%, N: 5.64%; Found: C: 79.54%, H: 7.45%, N: 5.53%.

**11PEF(3)PMM**: Yellow crystal, yield 44% and m.p. 91.78 °C. 1H-NMR (400 MHz, CDCl3, TMS) δ (ppm) 7.62-7.59 (dd, *J* = 6.7 Hz, *J* = 5.6 Hz, 1H), 7.59 (s, 1H), 7.55-7.52 (m, 2H), 7.50-7.48 (d, *J* = 8.3 Hz, 2H), 7.18-7.13 (m, 2H), 6.88-6.86 (d, *J* = 7.7 Hz, 2H), 3.98-3.95 (t, *J* = 6.0 Hz, 2H), 3.86 (s, 3H), 2.52 (s, 3H), 1.81-1.74 6 (m, 2H), 1.49-1.26 (m, 16H), 0.89-0.86 (t, *J* = 6.1 Hz, 3H). IR (KBr, pellet, cm-1): 3028, 2922, 2851, 2218, 1601, 1506, 1465, 1288, 1248, 1169, 1018, 835, 726, 597, 531. MALDI-TOF-MS m/z (rel. int.): Calc. 510.68, Found: 511.57 [M + H]+. EA: Calc. for C34H39FN2O: C: 79.96%, H: 7.70%, N: 5.49%; Found: C: 79.10%, H: 7.60%, N: 5.26%.

**5****PEF(3)PMN**: Brown crystal, yield 51% and m.p. 133.47 °C. 1H-NMR (400 MHz, CDCl3, TMS) δ (ppm) 8.36 (s, 1H), 8.27-8.22 (m, 1H), 7.67-7.64 (dd, *J* = 7.1 Hz, *J* = 6.4 Hz, 1H), 7.59 (s, 1H), 7.58-7.52 (m, 2H), 7.49-7.47 (d, *J* = 7.1 Hz, 2H), 6.87-6.85 (d, *J* = 10.1 Hz, 2H), 3.99-3.94 (m, 5H), 1.81-1.77 (m, 2H), 1.47-1.31 (m, 4H), 0.93-0.92 (t, *J* = 7.5 Hz, 3H). IR (KBr, pellet, cm-1): 3080, 2947, 2869, 2214, 1599, 1514, 1462, 1334, 1244, 1174, 1020, 827, 735, 598, 538. MALDI-TOF-MS m/z (rel. int.): Calc. 457.50, Found: 458.24 [M + H]+. EA: Calc. for C27H24FN3O3: C: 70.88%, H: 5.29%, N: 9.18%; Found: C: 70.28%, H: 5.28%, N: 8.90%.

**6PEF(3)PMN:** Brown crystal, yield 50% and m.p. 129.79 °C. 1H-NMR (400 MHz, CDCl3, TMS) δ (ppm) 8.39 (s, 1H), , 8.29-8.24 (m, 1H), 7.70-7.66 (dd, *J*= 8.7 Hz, *J* = 7.6 Hz, 1H), 7.60 (s, 1H), 7.59-7.56 (m, 2H), 7.51-7.49 (d, *J* = 6.9 Hz, 2H), 6.89-6.87 (d, *J* = 10.1 Hz, 2H), 4.00-3.96 (m, 5H), 1.83-1.75 (m, 2H), 1.48-1.34 (m, 6H), 0.93-0.92 (t, *J* = 6.2 Hz, 3H). IR (KBr, pellet, cm-1): 3074, 2941, 2872, 2210, 1603, 1514, 1466, 1339, 1251, 1167, 1020, 821, 738, 594, 532. MALDI-TOF-MS m/z (rel. int.): Calc. 471.52, Found: 472.41 [M + H]+. EA: Calc. for C28H26FN3O3: C: 71.32%, H: 5.56%, N: 8.91%; Found: C: 70.10%, H: 5.57%, N: 8.48%.

**7PEF(3)PMN**: Brown crystal, yield 41% and m.p. 112.09 °C. 1H-NMR (400 MHz, CDCl3, TMS) δ (ppm) 8.39 (s, 1H), 8.28-8.23 (m, 1H), 7.70-7.66 (dd, *J* = 8.2 Hz, *J* = 6.3 Hz, 1H), 7.60 (s, 1H), 7.59-7.56 (m, 2H), 7.51-7.49 (d, *J* = 7.7 Hz, 2H), 6.89-6.87 (d, *J* = 9.0 Hz, 2H), 4.01-3.96 (m, 5H), 1.82-1.75 (m, 2H), 1.47-1.31 (m, 8H), 0.90-0.87 (t, *J* = 6.9 Hz, 3H). IR (KBr, pellet, cm-1): 3074, 2935, 2858, 2212, 1603, 1514, 1465, 1338, 1264, 1164, 1026, 823, 734, 594, 530. MALDI-TOF-MS m/z (rel. int.): Calc. 485.55, Found: 486.49 [M + H]+.

**8PEF(3)PMN**: Brown crystal, yield 46% and m.p. 95.02 °C. 1H-NMR (400 MHz, CDCl3, TMS) δ (ppm) 8.39 (s, 1H), 8.27-8.23 (m, 1H), 7.70-7.66 (dd, *J* = 8.4 Hz, *J* = 7.4 Hz, 1H), 7.60 (s, 1H), 7.59-7.55 (m, 2H), 7.51-7.49 (d, *J* = 7.4 Hz, 2H), 6.89-6.87 (d, *J* = 8.4 Hz, 2H), 4.01-3.95 (m, 5H), 1.82-1.77 (m, 2H), 1.47-1.27 (m, 10H), 0.89-0.85 (t, *J* = 6.6 Hz, 3H). IR (KBr, pellet, cm-1): 3072, 2922, 2853, 2212, 1601, 1508, 1470, 1340, 1248, 1172, 1020, 829, 739, 594, 534. MALDI-TOF-MS m/z (rel. int.): Calc. 499.58, Found: 500.60 [M + H]+. EA: Calc. for C30H30FN3O3: C: 72.63%, H: 6.05%, N: 8.41%; Found: C: 71.85%, H: 6.06%, N: 8.17%.

**9PEF(3)PMN**: Brown crystal, yield 35% and m.p. 97.88 °C. 1H-NMR (400 MHz, CDCl3, TMS) δ (ppm) 8.39 (s, 1H), 8.30-8.23 (m, 1H), 7.70-7.66 (dd, *J* = 8.3 Hz, *J* = 8.2 Hz, 1H), 7.60 (s, 1H), 7.59-7.55 (m, 2H), 7.51-7.49 (d, *J* = 7.4 Hz, 2H), 6.87-6.86 (d, *J* = 8.8 Hz, 2H), 4.01-3.95 (m, 5H), 1.82-1.75 (m, 2H), 1.47-1.26 (m, 12H), 0.89-0.86 (t, *J* = 6.7 Hz, 3H). IR (KBr, pellet, cm-1): 3059, 2921, 2851, 2214, 1600, 1510, 1466, 1340, 1248, 1173, 1027, 833, 739, 592, 539. MALDI-TOF-MS m/z (rel. int.): Calc. 513.60, Found: 514.53 [M + H]+. EA: Calc. for C31H32FN3O3: C: 72.49%, H: 6.28%, N: 8.18%; Found: C: 72.07%, H: 6.30%, N: 8.02%.

**10PEF(3)PMN**: Brown crystal, yield 39% and m.p. 101.24 °C. 1H-NMR (400 MHz, CDCl3, TMS) δ (ppm) 8.40 (s, 1H), 8.31-8.24 (m, 1H), 7.70-7.67 (dd, *J* = 7.7 Hz, *J* = 8.4 Hz, 1H), 7.61 (s, 1H), 7.60-7.58 (m, 2H), 7.51-7.49 (d, *J* = 8.3 Hz, 2H), 6.90-6.87 (d, *J* = 8.3 Hz, 2H), 4.01-3.96 (m, 5H), 1.82-1.76 (m, 2H), 1.47-1.28 (m, 14H), 0.90-0.86 (t, *J* = 6. 9Hz, 3H). IR (KBr, pellet, cm-1): 3062, 2918, 2851, 2212, 1601, 1510, 1470, 1338, 1247, 1173, 1027, 835, 734, 592, 534. MALDI-TOF-MS m/z (rel. int.): Calc. 527.63, Found: 528.50 [M + H]+. EA: Calc. for C32H34FN3O3: C: 72.84%, H: 6.50%, N: 7.96%; Found: C: 72.73%, H: 6.46%, N: 7.77%.

**11PEF(3)PMN**: Brown crystal, yield 42% and m.p. 82.33 °C. 1H-NMR (400 MHz, CDCl3, TMS) δ (ppm) 8.36 (s, 1H), 8.26-8.22 (m, 1H), 7.67-7.64 (dd, *J* = 7.4 Hz, *J* = 8.4 Hz, 1H), 7.57 (s, 1H), 7.56-7.55 (m, 2H), 7.49-7.47 (d, *J* = 8.7 Hz, 2H), 6.87-6.85 (d, *J* = 8.7 Hz, 2H), 3.99-3.94 (m, 5H), 1.81-1.74 (m, 2H), 1.48-1.25 (m, 16H), 0.88-0.85 (t, *J* = 7.9 Hz, 3H). IR (KBr, pellet, cm-1): 3071, 2922, 2853, 2212, 1603, 1512, 1466, 1335, 1244, 1168, 1024, 825, 729, 592, 528. MALDI-TOF-MS m/z (rel. int.): Calc. 541.66, Found: 542.57 [M + H]+. EA: Calc. for C33H36FN3O3: C: 73.17%, H: 6.70%, N: 7.76%; Found: C: 72.83%, H: 6.41%, N: 7.81%.
